# Supplementary material for: Inborn errors of immunity in adulthood
Source: Springer Nature journal article supplement (doi:10.1186/s13223-023-00862-8), 2024-01-17
Supplement: MOESM1 [file 26636406]

## Supplemental Materials

Table S1. Systems approach to IEI manifestations.

| <b>System</b>    | <b>Examples of presentations</b>                                                                                                                                                                                    |
|------------------|---------------------------------------------------------------------------------------------------------------------------------------------------------------------------------------------------------------------|
| Pulmonary        | Respiratory infections, interstitial lung disease, bronchiolitis obliterans, pulmonary alveolar proteinosis, recurrent serositis                                                                                    |
| Dermatologic     | Infectious skin findings, erythroderma, eczematous lesions, cutaneous granuloma, vitiligo, psoriasis, photosensitive malar rash                                                                                     |
| Gastrointestinal | Chronic diarrhea, malabsorption, eosinophilic esophagitis, gastritis, inflammatory bowel disease, enteropathy, celiac-like disease, hepatitis, hepatomegaly, cirrhosis, cholangitis, biliary fibrosis, malignancies |
| Rheumatological  | Vasculitis, arthritis, uveitis, systemic lupus erythematosus-like syndrome, sarcoidosis, dermatomyositis-like syndromes                                                                                             |
| Endocrine        | Type I diabetes mellitus, autoimmune thyroiditis, hypoparathyroidism, adrenal insufficiency, growth failure                                                                                                         |
| Hematologic      | Immune thrombocytopenia, autoimmune hemolytic anemia, autoimmune neutropenia, lymphoma                                                                                                                              |
